# Supplementary material for: Incidence and prevalence of lupus in Buenos Aires, Argentina: a 11-year health management organisation-based study
Source: PubMed Central journal article supplement — Lupus Sci Med. 2014 Jun 5;1(1):e000021. doi: 10.1136/lupus-2014-000021 (PMC4213830; doi:10.1136/lupus-2014-000021), 2014-06-05
Supplement: lupus-2014-000021-s1.pdf [file lupus-2014-000021-s1.pdf]

TABLE 1: Demographic Data of the City of Buenos Aires Based on 2010 Argentine Census[3] and Hospital Italiano Medical Care Program ( ) Members on January 2009.

| Age Groups, yr | City of Buenos Aires |      | HIMCP   |      |
|----------------|----------------------|------|---------|------|
|                | Overall              | %    | Overall | %    |
| 0-14           | 472,511              | 16.3 | 21,888  | 14.5 |
| 15-24          | 395,806              | 13.7 | 14,120  | 9.4  |
| 25-34          | 495,663              | 17.1 | 21,452  | 14.2 |
| 35-44          | 396,202              | 13.7 | 17,402  | 11.6 |
| 45-54          | 342,647              | 11.9 | 16,228  | 10.8 |
| 55-64          | 313,251              | 10.8 | 20,353  | 13.5 |
| ≥ 65           | 474,071              | 16.4 | 39,095  | 25.9 |
| Total          | 2,890,151            | 100  | 150,540 | 100  |

TABLE 2: Ethnic origin of City of Buenos Aires inhabitants based on 2010 Argentine Census[3] , and Hospital Italiano Medical Care Program ( ) Members on January 2009.

| Ethnic origin    | City of Buenos Aires, % | HIMCP, % |
|------------------|-------------------------|----------|
| White            | 92                      | 94.5     |
| Asian            | 4                       | 2.7      |
| African American | 1                       | 0.5      |
| Mestizo          | 3                       | 2.3      |
| Total            | 100                     | 100      |

TABLE 3: Socioeconomic Level of City of Buenos Aires inhabitants (2008)[4] and Hospital Italiano Medical Care Program (HIMCP) Members (January 2009).

|                     | City of Buenos Aires, % | HIMCP, % |
|---------------------|-------------------------|----------|
| Socioeconomic Class |                         |          |
| Upper class         | 47                      | 62       |
| Middle class        | 38.6                    | 38       |
| Lower class         | 14.4                    | 0        |
| Total               | 100                     | 100      |
